# Supplementary material
Source: publisher figshare collection journal article supplement (https://karger.figshare.com/ndownloader/files/13182677)
Supplement: Supplementary file 1 [file 13182677]

| Detailed date for the patients. | | | | | | | | | | | | | |
| --- | --- | --- | --- | --- | --- | --- | --- | --- | --- | --- | --- | --- | --- |
| Pt | Age  (year) | Gender | PS | Stage | Treatment | Surgery | RT  (Total dose/fractions) | dose at a single fraction | Total dose (EQD2) | LR | Status | Cause of death | OS  (months) |
| 1 | 60 | male | 2 | ⅣC | RT |  | 25 Gy/5 fr | 5 | 31.2 | Yes | Dead | Abdomen metastasis | 0.7 |
| 2 | 61 | male | 1 | ⅣB | CRT→C→S | RX | 50 Gy/10 fr+24 Gy/12 fr | 5 | 86.5 | Yes | Dead | Side effect | 10.2 |
| 3 | 62 | male | 0 | ⅣB | S→RT | R0 or R1 | 10/2+50/25 | 2 | 62.5 | Yes | Dead | Local recurrence | 8.6 |
| 4 | 65 | female | 2 | ⅣC | CRT |  | 50/10 | 5 | 62.5 | No | Dead | Suspected lung metastasis** | 2.7 |
| 5 | 85 | male | 3 | ⅣB | RT |  | 50/10 | 5 | 62.5 | No | Dead | Suspected lung metastasis** | 3.2 |
| 6 | 81 | male | 2 | ⅣA | RT |  | 50/10 | 5 | 62.5 | No | Dead | Lung metastasis | 5.9 |
| 7 | 71 | female | 1 | ⅣC | CRT |  | 52/13 | 4 | 60.7 | Yes | Dead | Asphyxiation | 2.3 |
| 8 | 63 | male | 2 | ⅣB | RT |  | 60/12 | 5 | 75 | No | Alive |  | 1.4 |
| 9 | 64 | female | 2 | ⅣC | RT |  | 50/10 | 5 | 62.5 | Yes | Dead | Suspected lung metastasis** | 6.8 |
| 10 | 55 | male | 1 | ⅣC | S→CRT→C | R2 | 60/30 | 2 | 60 | No | Dead | Brain metastasis | 5.4 |
| 11 | 87 | female | 4 | ⅣB | S→RT | RX | 12/2 | 6 | 16 | No | Dead | Lung metastasis | 2.2 |
| 12 | 56 | male | 1 | other* | S→CRT→C | R0 or R1 | 12/10 (bd)+42/14 | 3 | 56.7 | No | Dead | Lung metastasis | 2.5 |
| 13 | 84 | female | 2 | ⅣA | RT |  | 50/10 | 5 | 62.5 | No | Alive |  | 17.0 |
| 14 | 68 | female | 1 | ⅣB | S→CRT | R2 | 70/35 | 2 | 70 | Yes | Dead | Asphyxiation | 10.6 |
| 15 | 78 | male | 2 | ⅣC | RT |  | 6/2 | 3 | 6.5 | Yes | Dead | Asphyxiation | 0.5 |
| 16 | 84 | male | 1 | ⅣA | S→RT | R2 | 50/10 | 5 | 62.5 | No | Dead | Lung metastasis | 5 |
| 17 | 56 | female | 1 | ⅣC | S→CRT | R2 | 50/10 | 5 | 62.5 | Yes | Dead | Bleeding from neck recurrence | 9.8 |
| 18 | 53 | female | 2 | ⅣB | RT |  | 51/34 (bd) | 1.5 | 48.9 | No | Dead | unknown | 5.2 |
| 19 | 49 | male | 2 | ⅣB | CRT→C |  | 50/10 | 5 | 62.5 | No | Dead | Mediastinal recurrence | 1.6 |
| 20 | 69 | male | 1 | other* | CRT |  | 50/10 | 5 | 62.5 | Yes | Alive |  | 1 |
| 21 | 73 | male | 3 | ⅣC | RT |  | 5/1 | 5 | 6.2 | No | Dead | Lung metastasis | 0.4 |
| 22 | 80 | male | 1 | other* | RT |  | 45/15 | 3 | 48.8 | No | Alive |  | 2 |
| 23 | 71 | male | 0 | ⅣC | C→CRT→C |  | 50/10 | 5 | 62.5 | No | Dead | Brain metastasis | 2.1 |
| 24 | 60 | male | 3 | ⅣC | C→CRT |  | 40/8 | 5 | 50 | No | Dead | Brain metastasis | 9.4 |
| 25 | 55 | female | 1 | ⅣB | C→CRT→C |  | 60/30 | 2 | 60 | Yes | Dead | Mediastinal recurrence*** | 11.3 |
| 26 | 41 | male | 1 | ⅣC | S→RT | R0 or R1 | 38/19 | 2 | 38 | Yes | Dead | Abdomen metastasis | 5.2 |
| 27 | 63 | male | 2 | ⅣB | CRT |  | 60/30 | 2 | 60 | Yes | Dead | Bleeding from neck recurrence | 5.5 |
| 28 | 80 | female | 2 | ⅣB | S→RT | R2 | 4/2+57/19 | 3 | 65.8 | No | Dead | Lung metastasis | 2.7 |
| 29 | 61 | male | 1 | ⅣB | C→RT |  | 57/19 | 3 | 61.8 | No | Dead | Brain metastasis | 3 |
| 30 | 76 | male | 0 | ⅣC | C→CRT→C |  | 50/10 | 5 | 62.5 | No | Dead | Lung metastasis | 3 |
| 31 | 81 | male | 2 | ⅣB | S→RT | R2 | 40/8 | 5 | 50 | No | Alive |  | 1.7 |
| 32 | 70 | female | 2 | ⅣA | C→RT |  | 50/10 | 5 | 62.5 | No | Dead | Lung metastasis | 3.4 |
| 33 | 69 | female | 1 | ⅣB | S→CRT→C | R2 | 54/27 | 2 | 54 | No | Dead | Lung metastasis | 7.5 |
| Note: EQD2 = equivalent dose in 2 Gy fractions, LR = local recurrence, OS = overall survival, RT = radiotherapy, CRT = chemoradiotherapy, C = chemotherapy, S = surgery, bd = bis in die  *: anaplastic change in the neck after surgery for differentiated thyroid cancer.  **: the patients died at another institution but suffered from deterioration of lung metastasis at the last follow-up in our institution.  ***: the patient died at another institution but suffered from the appearance of mediastinal metastasis at the last follow-up in our institution. | | | | | | | | | | | | | |
